# Supplementary material for: Changes in bacterial and archaeal communities during the concentration of brine at the graduation towers in Ciechocinek spa (Poland)
Source: PubMed Central journal article supplement (PMC5847177; doi:10.1007/s00792-017-0992-5), 2017-12-19

A

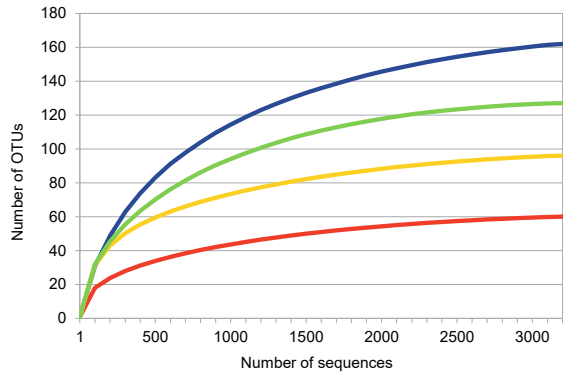

B

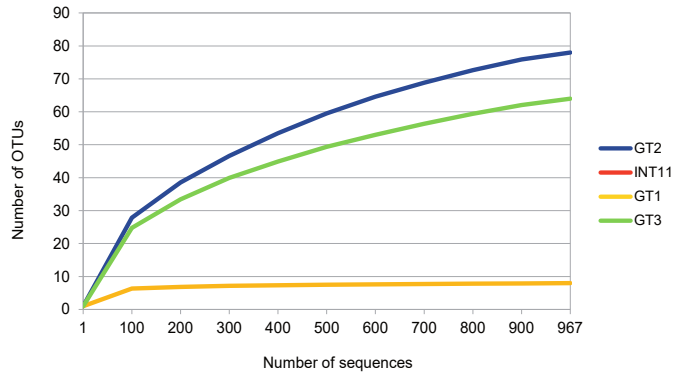

Supplement: 792_2017_992_MOESM3_ESM.pdf [file 792_2017_992_MOESM3_ESM.pdf]
